# Supplementary material for: Epidemiology and long-term disease burden of herpes zoster and postherpetic neuralgia in Taiwan: a population-based, propensity score-matched cohort study
Source: Springer Nature journal article supplement (doi:10.1186/s12889-018-5247-6), 2018-03-20
Supplement: MOESM2 [file 15549848]

**Additional File 2. ICD-9-CM codes of autoimmune diseases**

| <b>Disease</b>                        | <b>ICD-9-CM code</b>                                                     |
|---------------------------------------|--------------------------------------------------------------------------|
| Systemic lupus erythematosus          | 710.0                                                                    |
| Scleroderma                           | 710.1, 701.1, 711.1x, 778.1                                              |
| Sjögren's syndrome                    | 710.2                                                                    |
| Polymyositis & Dermatomyositis        | 710.3, 710.4                                                             |
| Diffuse diseases of connective tissue | 710.9, 279.4, 279.9                                                      |
| Rheumatoid arthritis                  | 714.xx                                                                   |
| Crohn's disease                       | 555.x                                                                    |
| Ulcerative colitis                    | 556.x                                                                    |
| Vasculitis                            | 136.1, 443.1, 446.0, 446.1, 446.2, 446.4, 446.5, 446.7,<br>447.6, 795.79 |
| Pemphigus                             | 694.4                                                                    |
| Discoid lupus erythematosus           | 695.4, 373.34                                                            |
| Psoriasis                             | 696.0, 696.1, 696.8                                                      |
| Ankylosing spondylitis                | 720.0, 720.9, 716.9x                                                     |
