# Supplementary material for: Epidemiology and long-term disease burden of herpes zoster and postherpetic neuralgia in Taiwan: a population-based, propensity score-matched cohort study
Source: Springer Nature journal article supplement (doi:10.1186/s12889-018-5247-6), 2018-03-20

**Additional File 3.**

**Incremental changes of outpatient visit in days after herpes zoster infection (Year 1)**

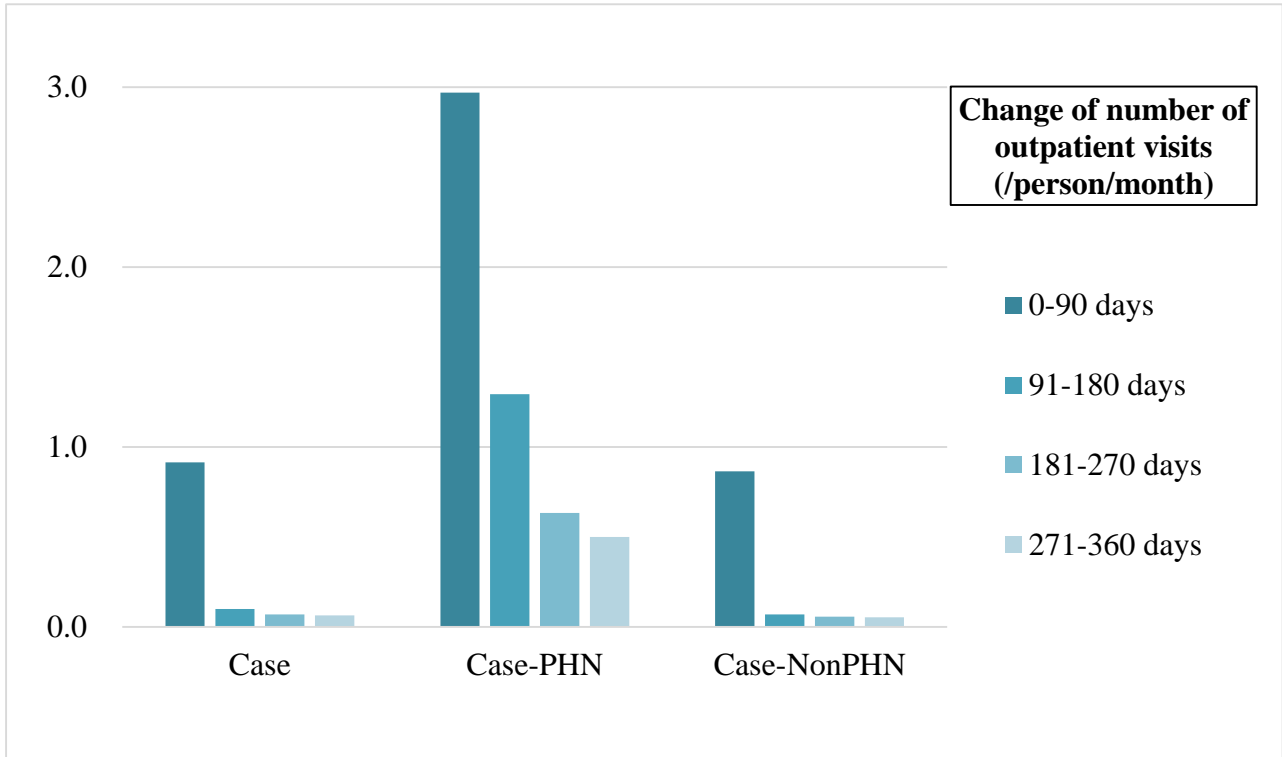

Supplement: MOESM3 [file 15549848]
